# Supplementary material for: Morphology-preserved transformation of CdS hollow structures toward photocatalytic H2 evolution
Source: Royal Society of Chemistry journal article supplement (doi:10.1039/c9ce01494b), 2020-01-01
Supplement: c9ce01494b1.pdf [file c9ce01494b1.pdf]

## Morphology-preserved Transformation of CdS Hollow Structures Toward Photocatalytic H<sub>2</sub> Evolution

Ye Liu<sup>ab</sup>, Cheng Huang<sup>a</sup>, Tengfei Zhou<sup>b</sup> and Juncheng Hu<sup>a\*</sup>

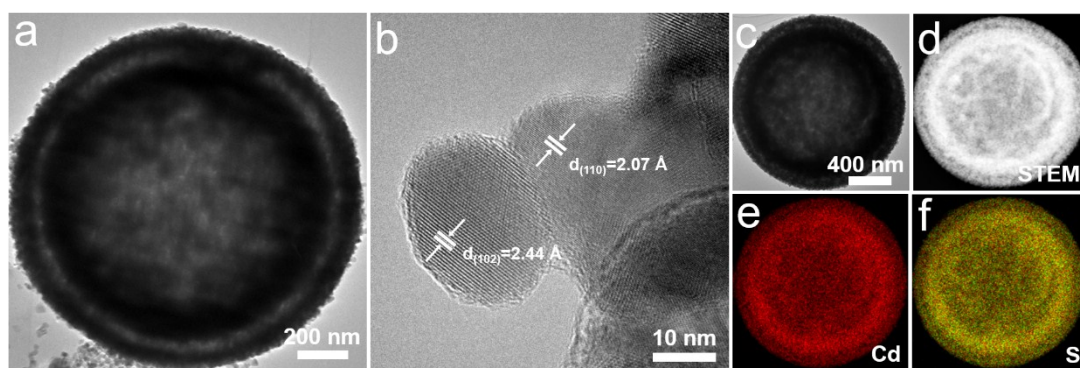

Figure S1. a-b) TEM and HRTEM images of CdS-6. d-f) Corresponding HAADF-STEM and EDX mapping images of CdS-6

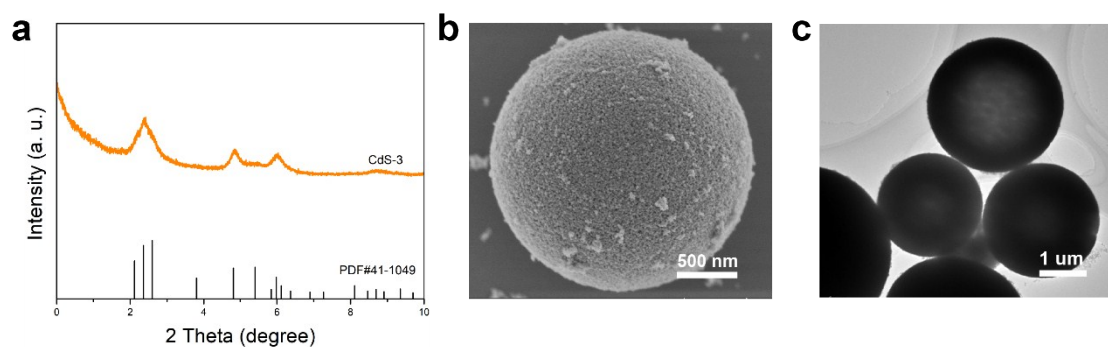

Figure S2. a) XRD pattern of CdS-3; b-c) SEM and TEM images of CdS-3

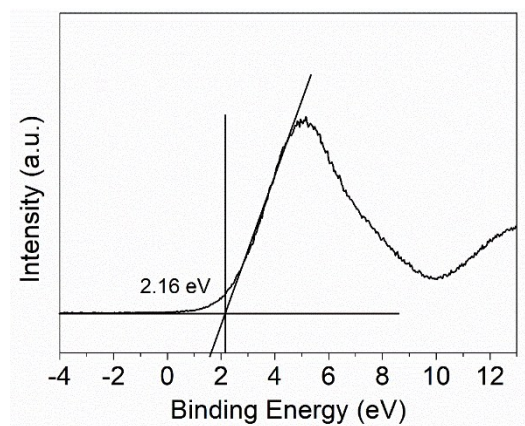

Figure S3. VB XPS spectra of CdS-6

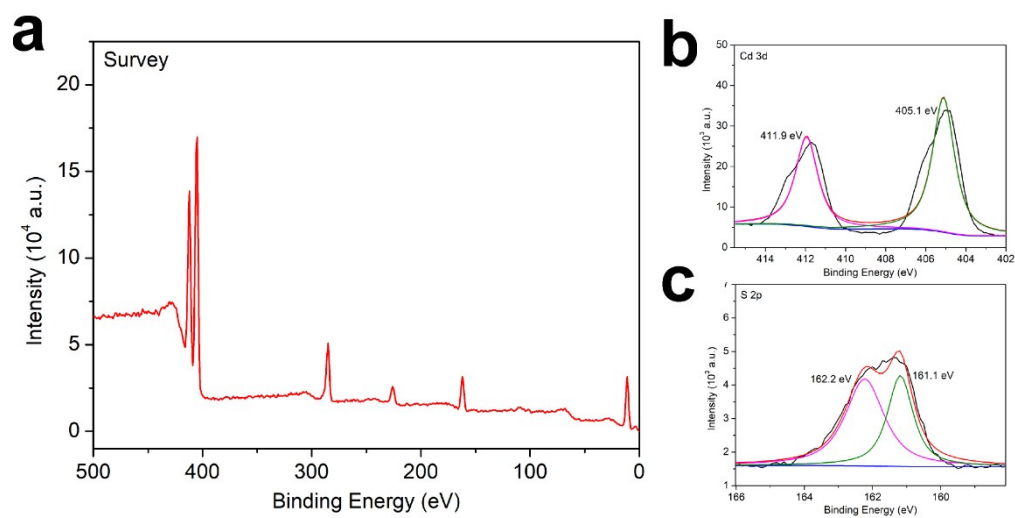

Figure S4. XPS spectra of CdS-6 after photocatalytic HER tests

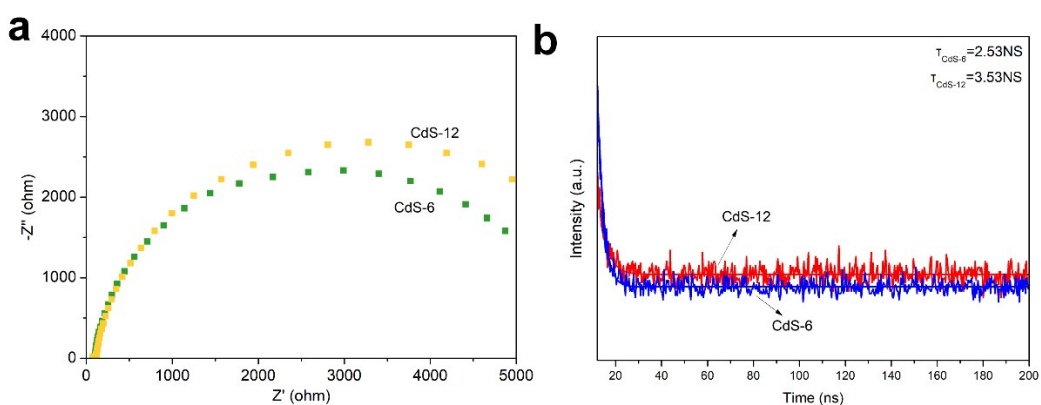

Figure S5. a) Electrochemical impedance spectra of the samples; b) Time-resolved photoluminescence spectra of the samples.
